# Supplementary material for: Marine Chitosan-Oligosaccharide Ameliorated Plasma Cholesterol in Hypercholesterolemic Hamsters by Modifying the Gut Microflora, Bile Acids, and Short-Chain Fatty Acids
Source: MDPI journal article supplement (doi:10.3390/nu15132923), 2023-06-27
Supplement: s1 [file s1]

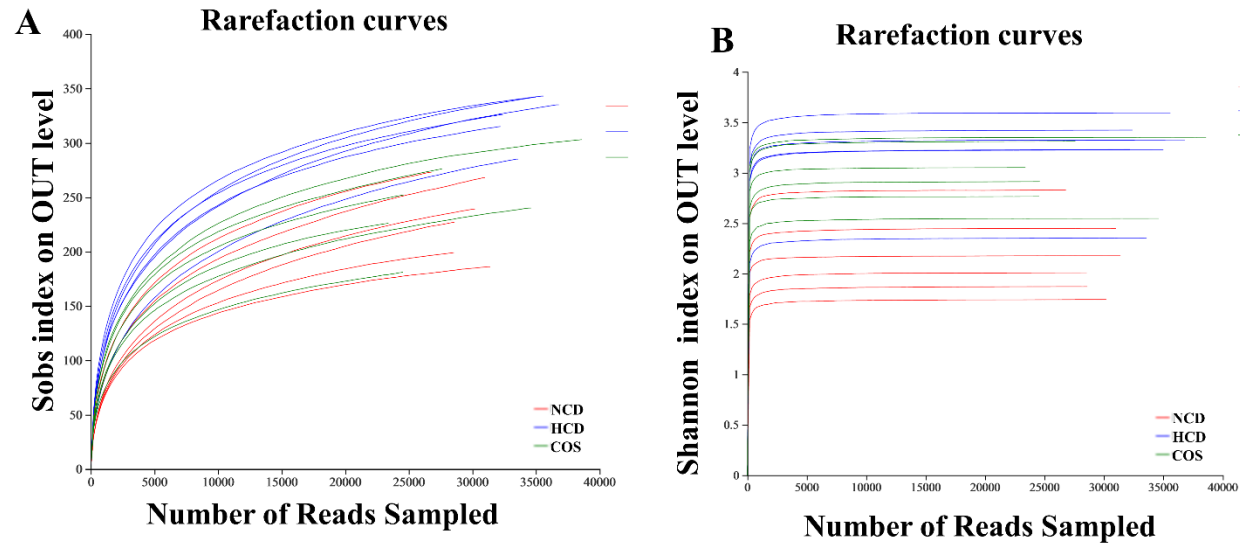

**Supplementary Figure S1.** Rarefaction curves of Sobs index (A) and Shannon index (B) in hamsters fed one of the three diets: NCD, Non-cholesterol diet; HCD, high cholesterol diet; COS, HCD with addition of 5% chitosan-oligosaccharides (COS). ( $n = 6$ ).
